# Supplementary material
Source: PubMed Central journal article supplement (PMC4643363)

**Supplemental Table 1. Results from full logistic regression model using data from 1995 to 2013 (n=7,313 with complete data).**

|                          | <b>Odds Ratio</b> | <b>95%<br/>Confidence<br/>Interval</b> | <b>P-value</b> |
|--------------------------|-------------------|----------------------------------------|----------------|
| <b>Year</b>              | 1.08              | (1.04, 1.12)                           | <0.001         |
| <b>Funding Agency</b>    |                   |                                        |                |
| Industry                 | Reference         |                                        |                |
| NIH                      | 2.38              | (1.42, 4.00)                           | 0.001          |
| U.S. Federal Government  | 2.56              | (1.44, 4.57)                           | 0.001          |
| Combination of the above | 2.92              | (2.01, 4.24)                           | <0.001         |
| Other                    | 2.46              | (1.67, 3.62)                           | <0.001         |
| <b>Study Type</b>        |                   |                                        |                |
| Expanded Access          | Omitted*          |                                        |                |
| Interventional           | Reference         |                                        |                |
| Observational            | 0.82              | (0.61, 1.12)                           | 0.21           |
| <b>Intervention</b>      |                   |                                        |                |
| Behavioral               | Reference         |                                        |                |
| Biological               | 0.02              | (0.01, 0.07)                           | <0.001         |
| Device                   | 0.13              | (0.08, 0.21)                           | <0.001         |
| Dietary Supplement       | 0.13              | (0.06, 0.28)                           | <0.001         |
| Drug                     | 0.14              | (0.11, 0.19)                           | <0.001         |
| Genetic                  | 0.09              | (0.01, 0.67)                           | 0.018          |
| Other                    | 0.34              | (0.25, 0.46)                           | <0.001         |
| Procedure                | 0.19              | (0.12, 0.29)                           | <0.001         |
| Radiation                | 0.02              | (0.01, 0.07)                           | 0.001          |
| <b>Phase</b>             |                   |                                        |                |
| Phase 0                  | Reference         |                                        |                |
| Phase 1                  | 0.67              | (0.27, 1.71)                           | 0.41           |
| Phase 1   Phase 2        | 0.58              | (0.21, 1.56)                           | 0.28           |
| Phase 2                  | 0.56              | (0.23, 1.39)                           | 0.21           |
| Phase 2   Phase 3        | 1.09              | (0.37, 3.21)                           | 0.87           |
| Phase 3                  | 1.01              | (0.4, 2.55)                            | 0.99           |
| Phase 4                  | 1.16              | (0.46, 2.94)                           | 0.75           |
| Other                    | 0.81              | (0.34, 1.95)                           | 0.64           |
| <b>Sex</b>               |                   |                                        |                |
| Both                     | Reference         |                                        |                |
| Female                   | 1.07              | (0.8, 1.43)                            | 0.63           |
| Male                     | 0.69              | (0.4, 1.19)                            | 0.19           |
| <b>Region Opened</b>     |                   |                                        |                |
| Midwest                  | Reference         |                                        |                |
| Northeast                | 1.08              | (0.78, 1.50)                           | 0.65           |
| South                    | 0.79              | (0.57, 1.09)                           | 0.15           |
| West                     | 0.99              | (0.67, 1.48)                           | 0.98           |

|                                                                                    |       |                |        |
|------------------------------------------------------------------------------------|-------|----------------|--------|
| Multi-region                                                                       | 0.75  | (0.51, 1.09)   | 0.13   |
| <b>Percent responding that they speak English only (ZIP-code)</b>                  |       |                |        |
| Linear spline term for each 10% increase                                           | 1.23  | (0.88, 1.72)   | 0.23   |
| Cubic spline term for each 10% increase                                            | 0.76  | (0.55, 1.05)   | 0.09   |
| <b>Percent responding that they speak English less than “very well” (ZIP-code)</b> |       |                |        |
| Linear spline term for each 10% increase                                           | 0.94  | (0.43, 2.08)   | 0.88   |
| Cubic spline term for each 10% increase                                            | 1.37  | (0.49, 3.88)   | 0.55   |
| <b>Poverty Rate (ZIP-code)</b>                                                     |       |                |        |
| Linear spline term for each 10% increase                                           | 1.19  | (0.91, 1.56)   | 0.22   |
| Cubic spline term for each 10% increase                                            | 0.80  | (0.57, 1.12)   | 0.20   |
| <b>Percent responding that they are White (ZIP-code)</b>                           |       |                |        |
| Linear spline term for each 10% increase                                           | 1.73  | (0.82, 3.66)   | 0.15   |
| Cubic spline term for each 10% increase                                            | 0.99  | (0.83, 1.18)   | 0.91   |
| <b>Percent responding that they are Black/African American (ZIP-code)</b>          |       |                |        |
| Linear spline term for each 10% increase                                           | 1.55  | (0.69, 3.52)   | 0.29   |
| Cubic spline term for each 10% increase                                            | 1.22  | (0.71, 2.09)   | 0.48   |
| <b>Percent responding that they are Asian (ZIP-code)</b>                           |       |                |        |
| Linear spline term for each 10% increase                                           | 1.49  | (0.59, 3.78)   | 0.40   |
| Cubic spline term for each 10% increase                                            | 1.24  | (0.56, 2.72)   | 0.59   |
| <b>Percent responding that they are Hispanic (ZIP-code)</b>                        |       |                |        |
| Linear spline term for each 10% increase                                           | 2.02  | (0.80, 5.07)   | 0.14   |
| Cubic spline term for each 10% increase                                            | 0.67  | (0.30, 1.47)   | 0.32   |
| <b>Intercept</b>                                                                   | <.001 | (<.001, <.001) | <0.001 |

\*The expanded access category was omitted due to a small sample size and zero cell: none of the 12 expanded access trials had English fluency restrictions.

**Supplemental Table 2. Results from interaction of year with type of intervention.** The likelihood ratio test for the six intervention terms was  $\chi^2=17.1$ , 6 degrees of freedom,  $p=0.009$ . Similar interaction tests with funding agency, study type, phase of trial, genders included, region, and ZIP-code demographic characteristics were not statistically significant. To confirm that outliers from early years were not affecting the results below, we repeated this analysis for studies opened only in later time periods. We found that  $p=0.036$  when only including studies opened after 1994, and  $p=0.008$  when only including studies opened after 2004. The likelihood ratio test for the interactions when added to the full model in Supplemental Table 1 was  $\chi^2=14.0$ , 6 degrees of freedom,  $p=0.030$ . In this analysis, year is centered to be zero at 2000.

|                                    | <b>Odds Ratio</b> | <b>95%<br/>Confidence<br/>Interval</b> | <b>P-<br/>value</b> |
|------------------------------------|-------------------|----------------------------------------|---------------------|
| <b>Intervention</b>                |                   |                                        |                     |
| Procedure                          | Reference         |                                        |                     |
| Behavioral                         | 2.76              | (1.45,5.23)                            | 0.002               |
| Biological                         | 0.003             | (0.00003,0.35)                         | 0.017               |
| Device                             | 0.23              | (0.06,0.84)                            | 0.026               |
| Dietary Supplement                 | 0.001             | (0.00001,0.27)                         | 0.015               |
| Drug                               | 0.28              | (0.15,0.53)                            | <0.001              |
| Other                              | 0.53              | (0.26,1.05)                            | 0.07                |
| <b>Year – 2000</b>                 | 1.00              | (0.93,1.07)                            | 0.90                |
| <b>Interaction terms</b>           |                   |                                        |                     |
| Procedure x (Year – 2000)          | Reference         |                                        |                     |
| Behavioral x (Year – 2000)         | 1.08              | (0.995,1.17)                           | 0.065               |
| Biological x (Year – 2000)         | 1.41              | (0.89,2.25)                            | 0.15                |
| Device x (Year – 2000)             | 1.14              | (0.98,1.31)                            | 0.083               |
| Dietary Supplement x (Year – 2000) | 1.88              | (1.14,3.1)                             | 0.014               |
| Drug x (Year – 2000)               | 1.07              | (0.99,1.16)                            | 0.10                |
| Other x (Year – 2000)              | 1.13              | (1.04,1.23)                            | 0.005               |
| Intercept                          | 0.08              | (0.05,0.14)                            | <0.001              |

Supplemental Figure 1: Scatter plots of the pairwise proportions reporting each demographic characteristic within ZIP codes. The four proportions do not sum to one since those reporting more than one race or reporting another race are not included in these four groups. The Spearman correlations and p-values are given at the top of each subfigure.

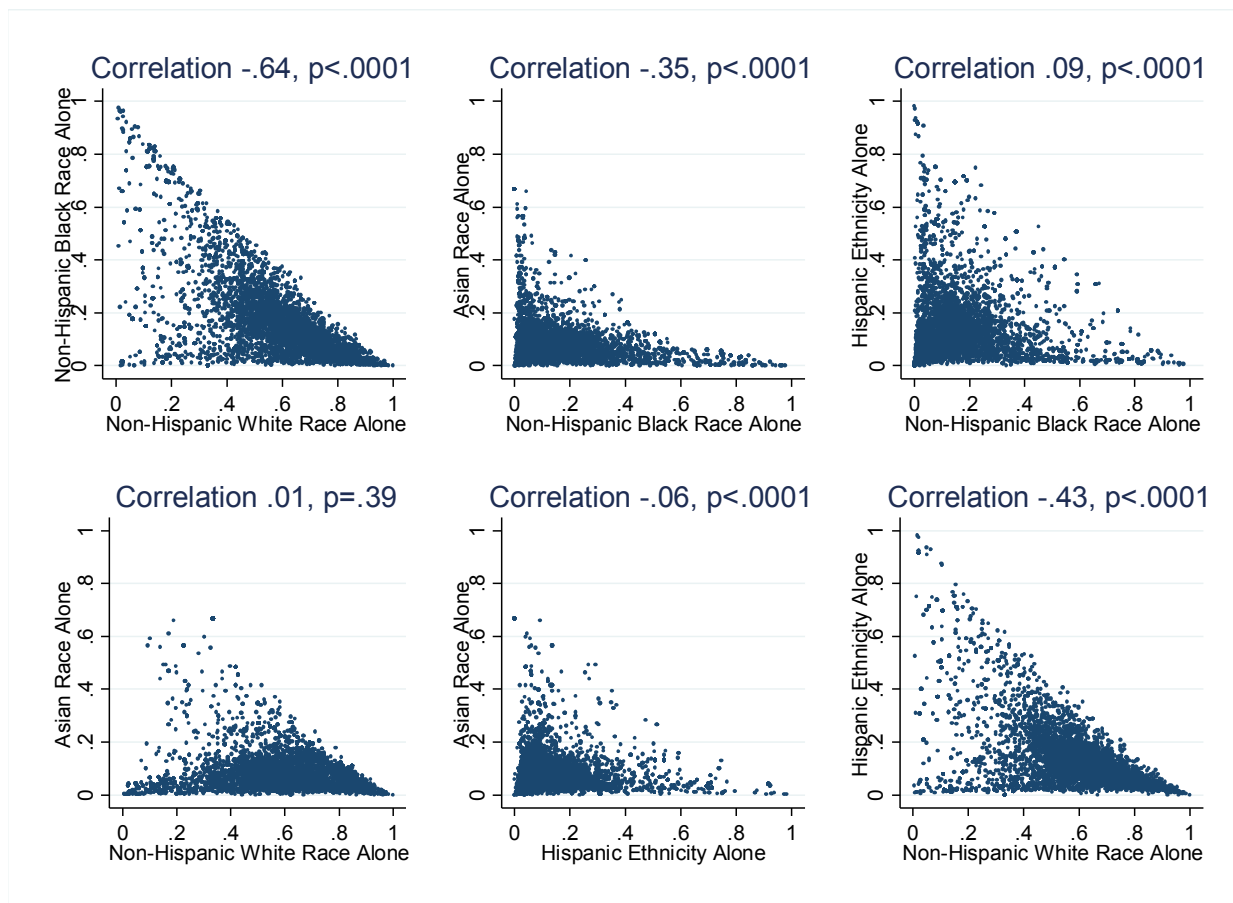

Supplement: NIHMS697302-supplement-supplement_1.pdf [file NIHMS697302-supplement-supplement_1.pdf]
